# Supplementary material for: Genome-wide association analysis provides insights into the genetic basis of photosynthetic responses to low-temperature stress in spring barley
Source: Frontiers journal article supplement (doi:10.3389/fpls.2023.1159016), 2023-06-06

## *Supplementary Material*

# **Genome-wide association analysis provides insights into the genetic basis of photosynthetic responses to low-temperature stress in spring barley**

**Ammar Elakhdar<sup>1,2,\*</sup>, Jan J. Slaski<sup>3</sup>, Takahiko Kubo<sup>2</sup>, Aladdin Hamwiah, Aaron D. Beattie<sup>4</sup>, Ludovic J.A. Capo-chichi<sup>5</sup>**

**\* Correspondence:**

Ammar Elakhdar

[a.elakhdar@kyudai.jp](mailto:a.elakhdar@kyudai.jp)

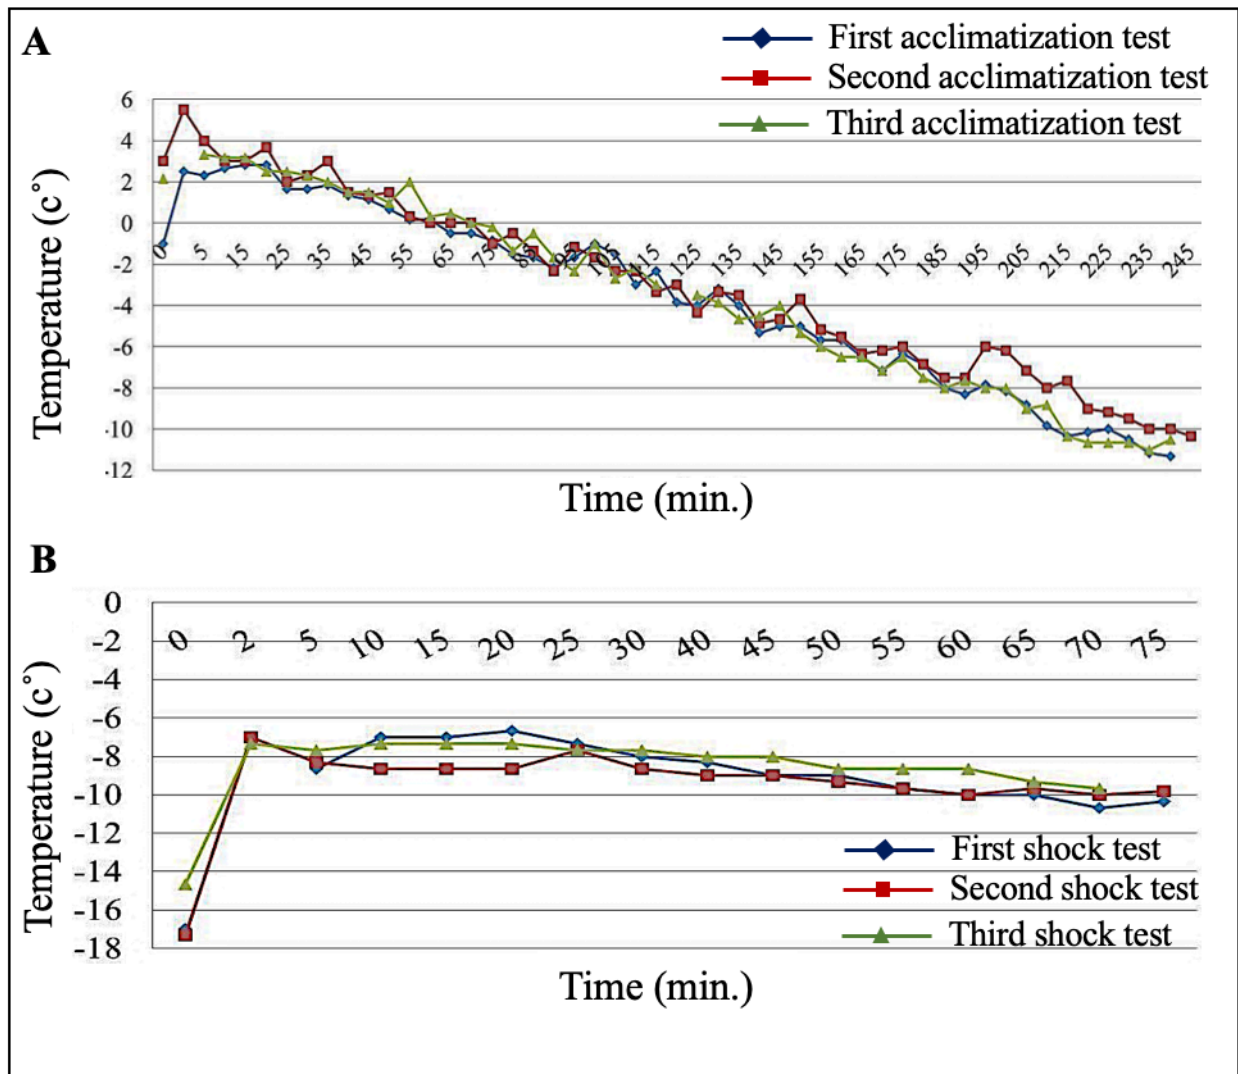

**Supplementary Figure 1:** Temperature variation during cold acclimation treatment (A) and freezing shock (B) of 96 spring barley lines and 4 winter barley lines at the three-leaf stage.

## HORVU1Hr1G087520

SUMO transferase activity [GO:0019789] | zinc ion binding [GO:0008270]

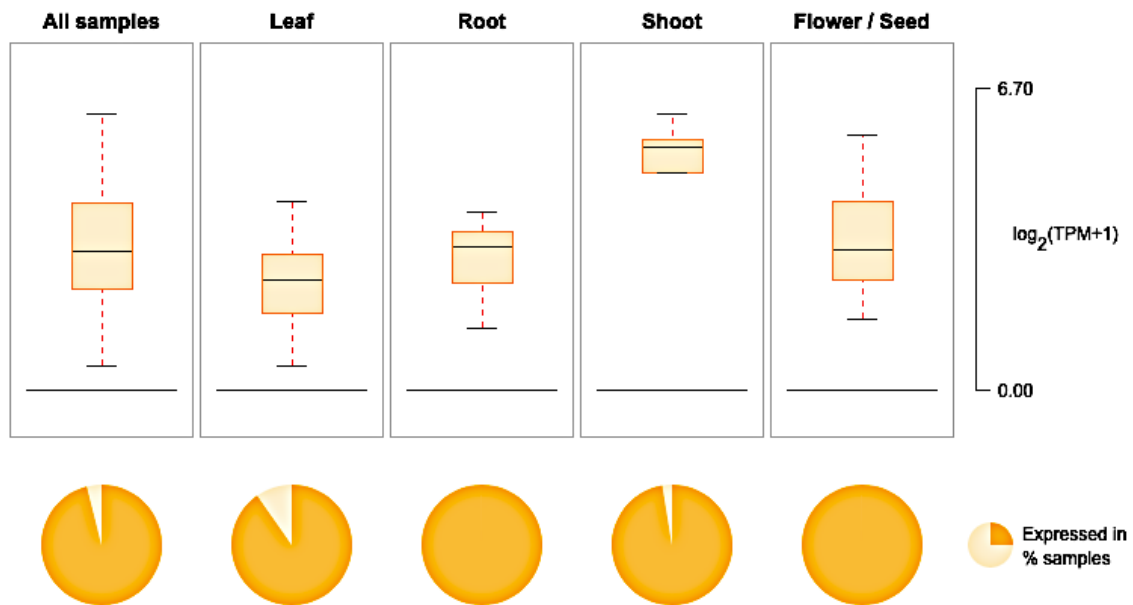

## HORVU3Hr1G071210

hydrolase activity, hydrolyzing O-glycosyl compounds [GO:0004553]

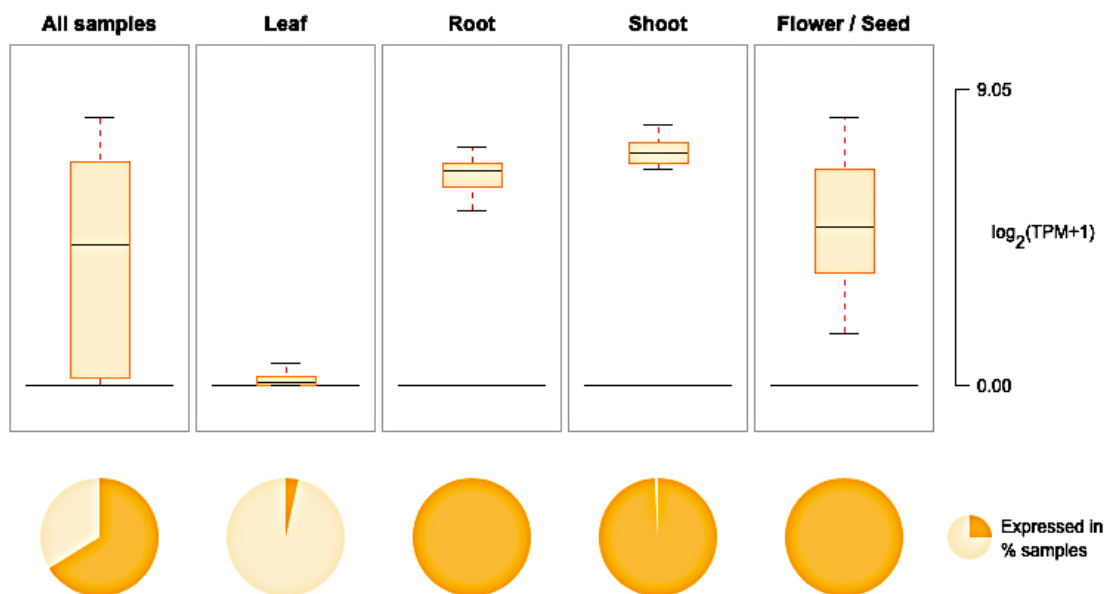

**HORVU3Hr1G071240****ATP binding [GO:0005524] | protein kinase activity [GO:0004672]**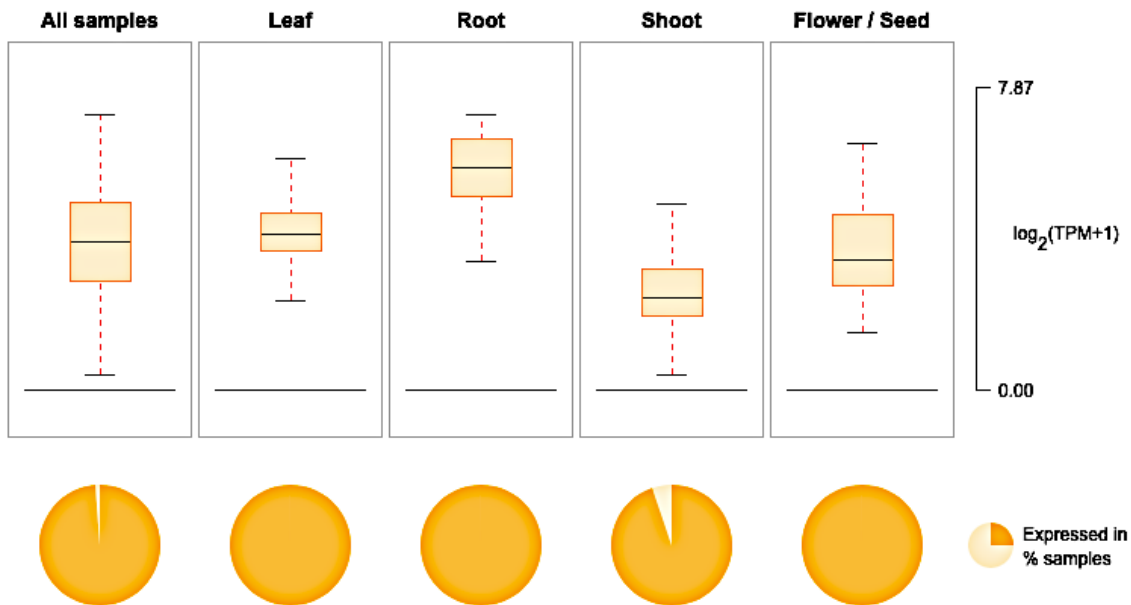**HORVU6Hr1G005960****DNA binding [GO:0003677] | protein heterodimerization activity [GO:0046982]**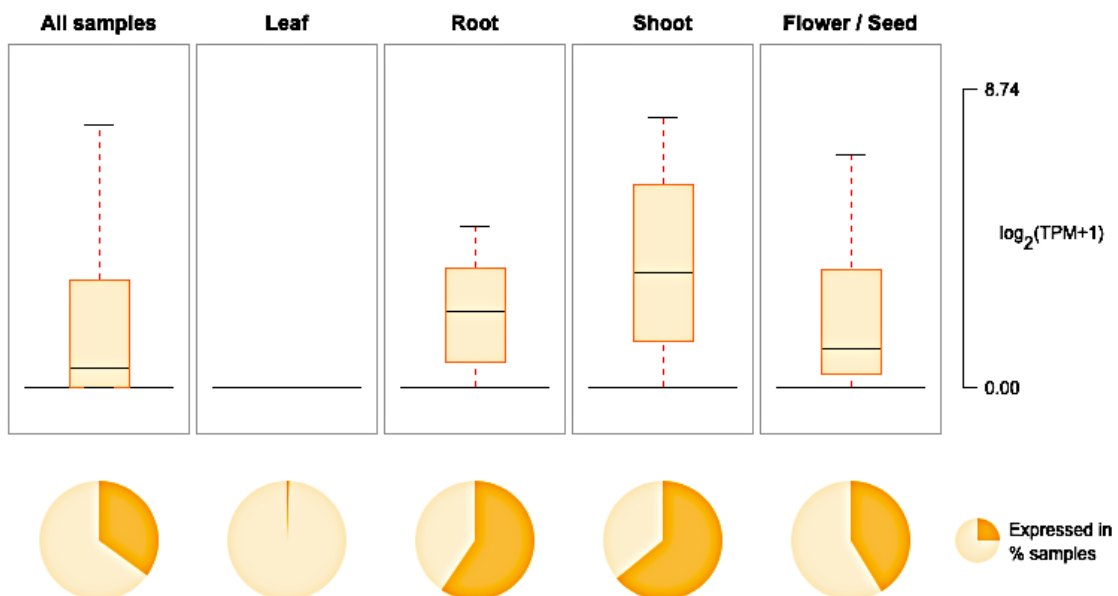

**HORVU3Hr1G059320**  
**ATP hydrolysis coupled proton transport [GO:0015991]**

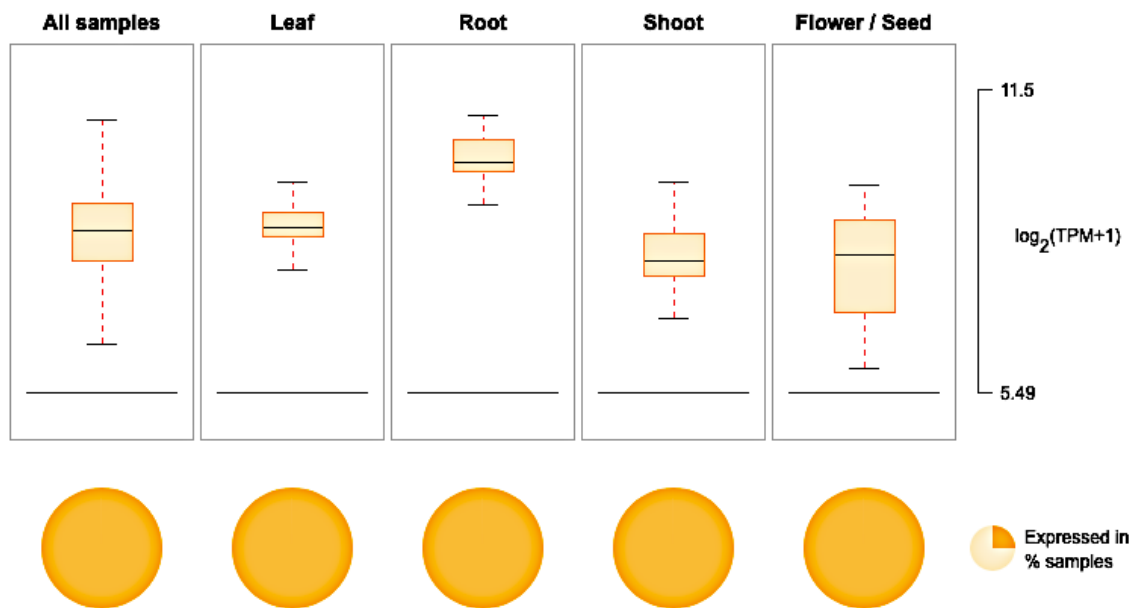

**HORVU3Hr1G061690**  
**Protein DEHYDRATION-INDUCED 19 homolog 3**

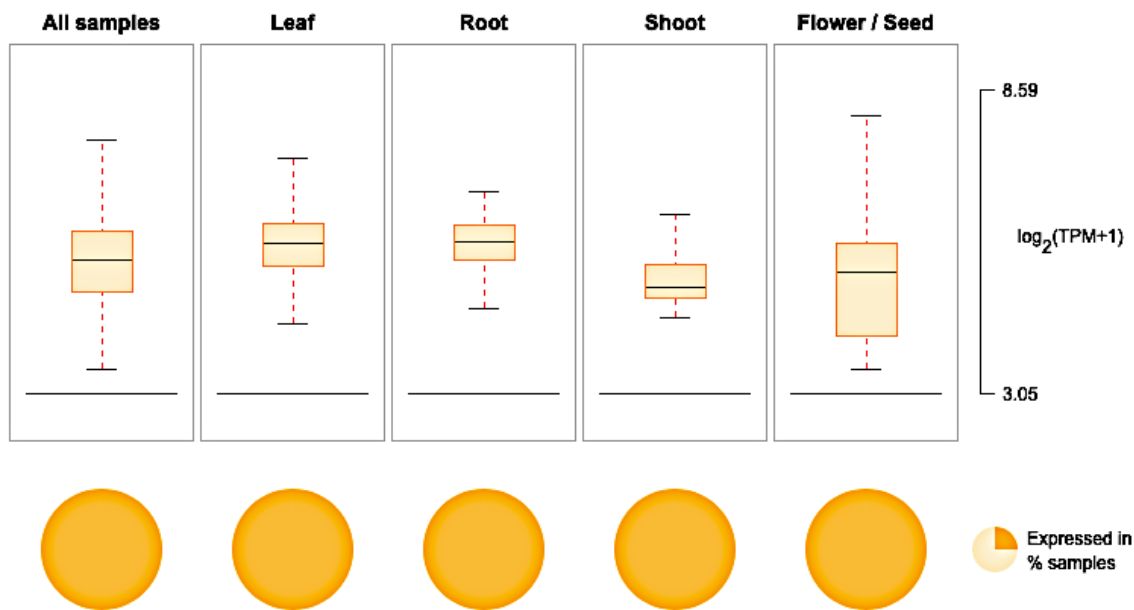

**HORVU3Hr1G062030**

**Rho guanyl-nucleotide exchange factor activity [GO:0005089]**

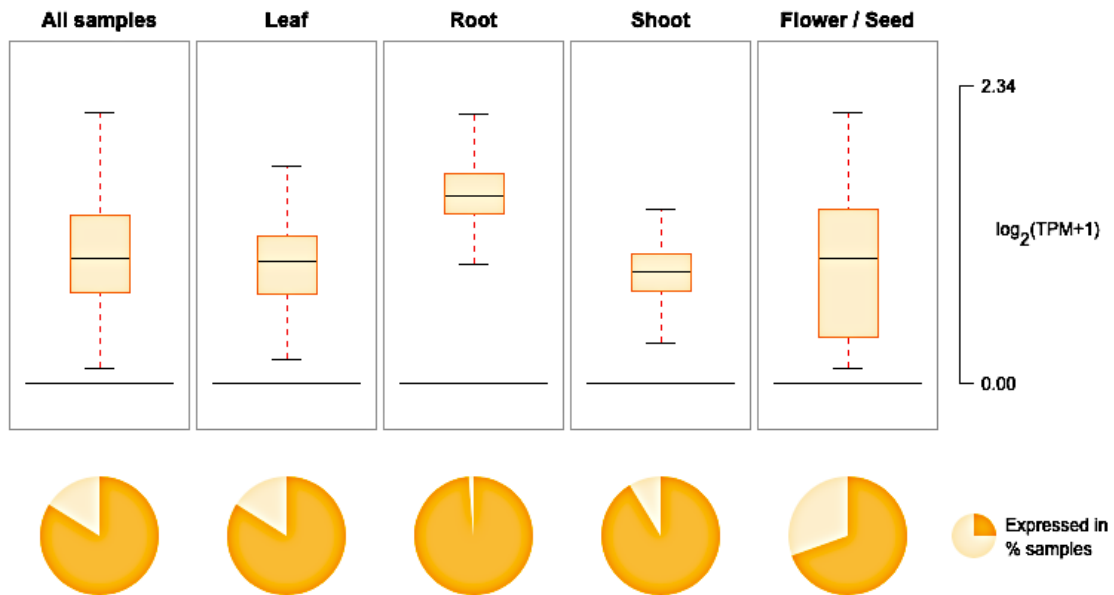

**HORVU3Hr1G063220**

**mRNA splicing, via spliceosome [GO:0000398] | regulation of embryo sac egg cell differentiation [GO:0045694]**

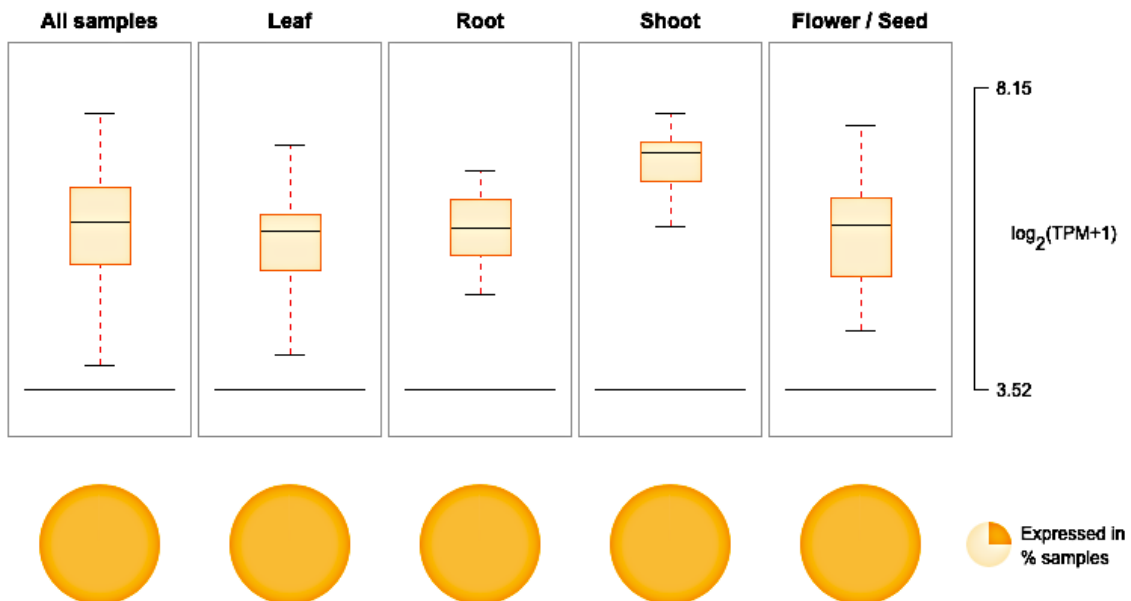

**HORVU1Hr1G085880**  
**signal transduction [GO:0007165]**

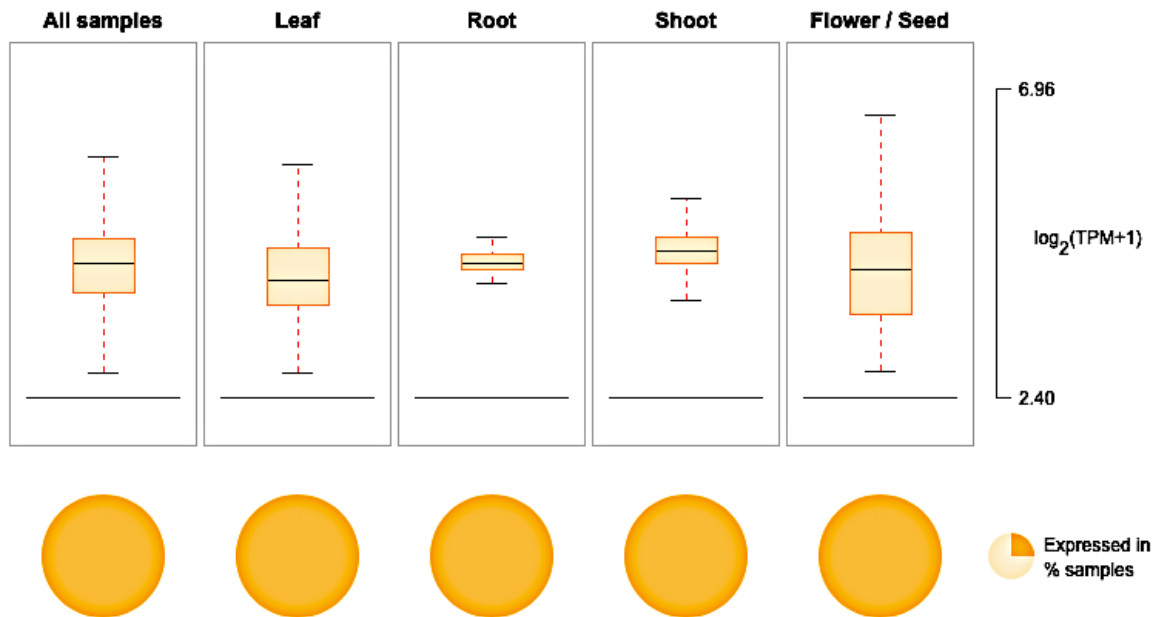

**Supplementary Figure 2:** Gene co-expression for the identified genes was revealed from the Global gene co-expression networks (GCNs) database PlantNexus (<https://plantnexus.ohio.edu>).

**Supplementary Table 1.** List of crosses made between spring and winter barley types.

| Cross |   | Spring genotypes |   | Winter genotypes   |
|-------|---|------------------|---|--------------------|
| 3     | ♀ | Meredith         | ♂ | 02Ab431            |
| 4     | ♀ | AC Metcalfe      | ♂ | 02Ab08-X05W061-208 |
| 5     | ♀ | TR643            | ♂ | 02Ab671            |
| 6     | ♀ | TR990            | ♂ | 02Ab431            |
| 11    | ♀ | TR162            | ♂ | 02Ab671            |
| 12    | ♀ | TR490            | ♂ | 02Ab671            |
| 13    | ♀ | TR05912          | ♂ | 02Ab08-X05W061-208 |
| 14    | ♀ | CDC Reserve      | ♂ | 02Ab431            |
| 15    | ♀ | Meredith         | ♂ | 02Ab08-X05W061-208 |
| 16    | ♀ | TR643            | ♂ | 02Ab08-X05W061-208 |
| 17    | ♀ | TR490            | ♂ | 02Ab08-X05W061-208 |
| 18    | ♀ | AC Metcalfe      | ♂ | 02Ab431            |
|       |   |                  |   |                    |
|       |   | Winter genotypes |   | Spring genotypes   |
| 1     | ♀ | 02Ab669          | ♂ | TR990              |
| 2     | ♀ | 02Ab431          | ♂ | TR5287             |
| 7     | ♀ | 02Ab08-X05W061   | ♂ | CDC Reserve        |
| 8     | ♀ | 02Ab431          | ♂ | AC Metcalfe        |
| 9     | ♀ | 02Ab431          | ♂ | Benthey            |
| 10    | ♀ | 02Ab08-X05W061   | ♂ | AC Metcalfe        |

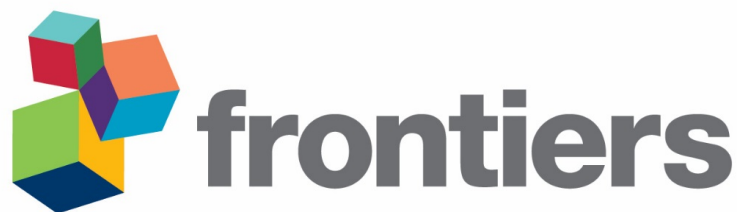

Supplement: Data_Sheet_1.pdf [file Data_Sheet_1.pdf]
